# Supplementary material for: 2D iron/cobalt metal–organic frameworks with an extended ligand for efficient oxygen evolution reaction
Source: Royal Society of Chemistry journal article supplement (doi:10.1039/d3dt01175e), 2023-01-01
Supplement: d3dt01175e1.pdf [file d3dt01175e1.pdf]

## Supporting Information

### 2D Iron/Cobalt Metal-Organic Frameworks with an Extended Ligand for Efficient Oxygen Evolution Reaction

Wenjing Shang, Qiulin Li, Xiang Li, Ke Zhang, Binghao Wang, Yongbing Lou, Jinxi Chen\*

*School of Chemistry and Chemical Engineering, Jiangsu Engineering Laboratory of Smart Carbon-Rich Materials and Device, Southeast University, Nanjing 211189, PR China*

*\*Corresponding author*

*\*E-mail address: chenjinxi@seu.edu.cn (J. Chen)*

#### Calculation formulas

Some data needed to be calculated in the experimental process, and the calculation formulas were as follows:

Overpotential:  $\eta = E_{\text{RHE}} - 1.23 \text{ V}$ ,

where  $E_{\text{RHE}}$  referred to reversible hydrogen electrode,  $E_{\text{RHE}} = E_{\text{Ag/AgCl}} + 0.059 \cdot \text{pH} + 0.197 \text{ V}$

Tafel slope:  $\eta = b \log j + a$ ,

where  $b$  was the Tafel slope. It was derived from the LSV curve,  $\log j$  ( $j$  was the current density) as the abscissa and  $\eta$  as the ordinate, and the resulting slope was called the Tafel slope.

$2C_{\text{dl}}$  is estimated by plotting  $\Delta J = (J_{\text{a}} - J_{\text{c}})$  at 0.8794 V against the scan rates.

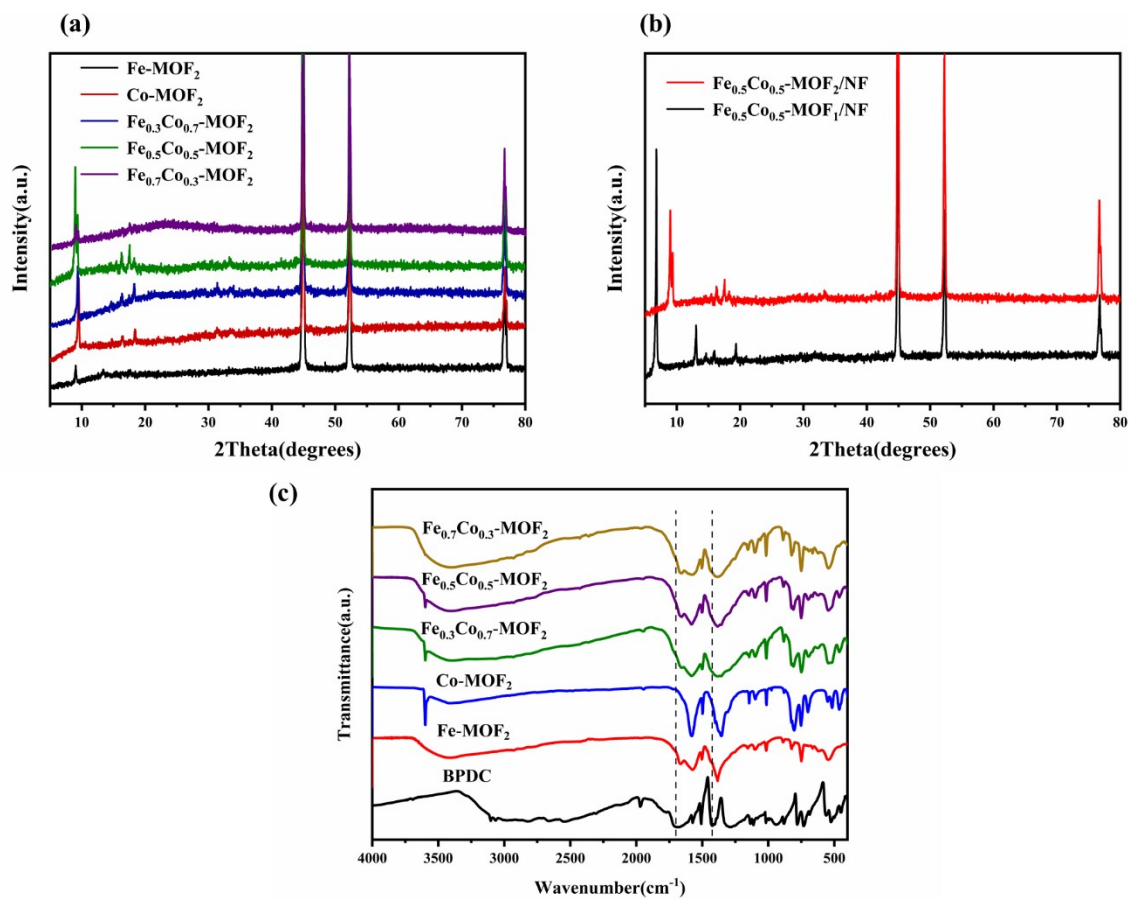

**Figure S1.** a) XRD patterns of  $\text{Fe}_x\text{Co}_{1-x}\text{-MOF}_2$ , b)  $\text{Fe}_{0.5}\text{Co}_{0.5}\text{-MOF}_1$  and  $\text{Fe}_{0.5}\text{Co}_{0.5}\text{-MOF}_2$ ,  
 c) FT-IR spectra of  $\text{Fe}_x\text{Co}_{1-x}\text{-MOF}_2$

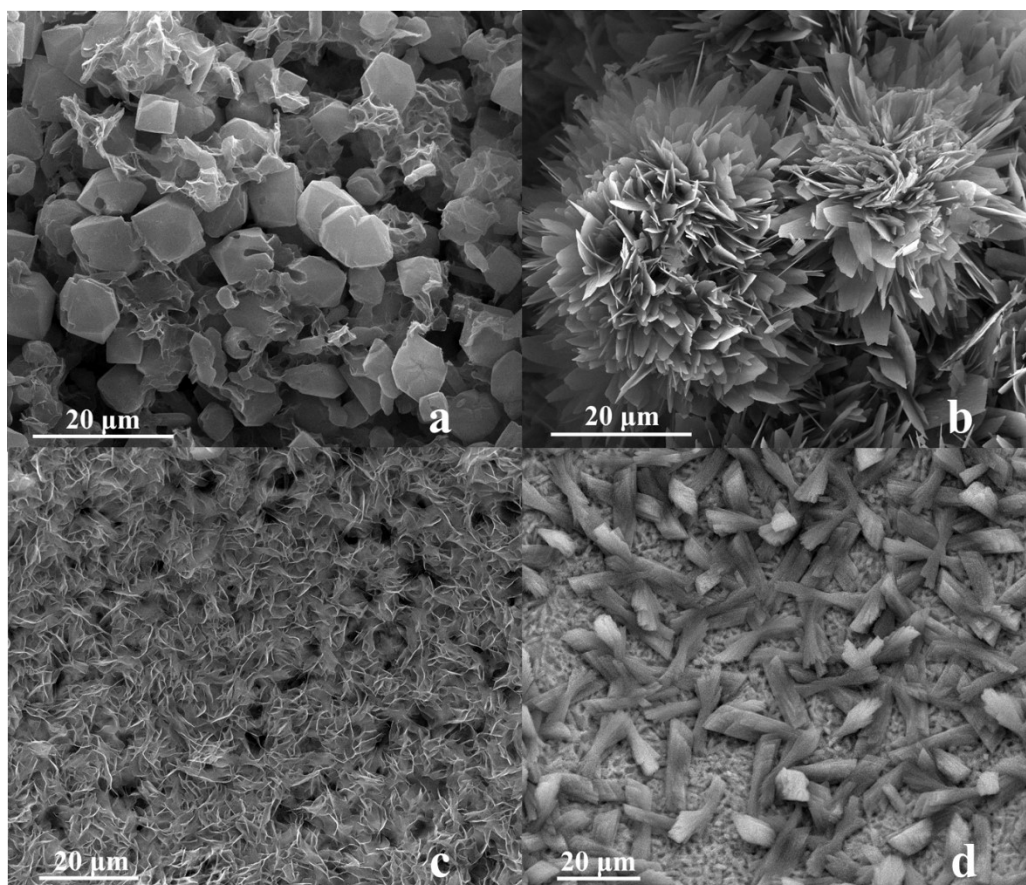

**Figure S2.** a) SEM images of Fe-MOF<sub>1</sub>/NF, b) Co-MOF<sub>1</sub>/NF, c) Fe-MOF<sub>2</sub>/NF, d) Co-MOF<sub>2</sub>/NF

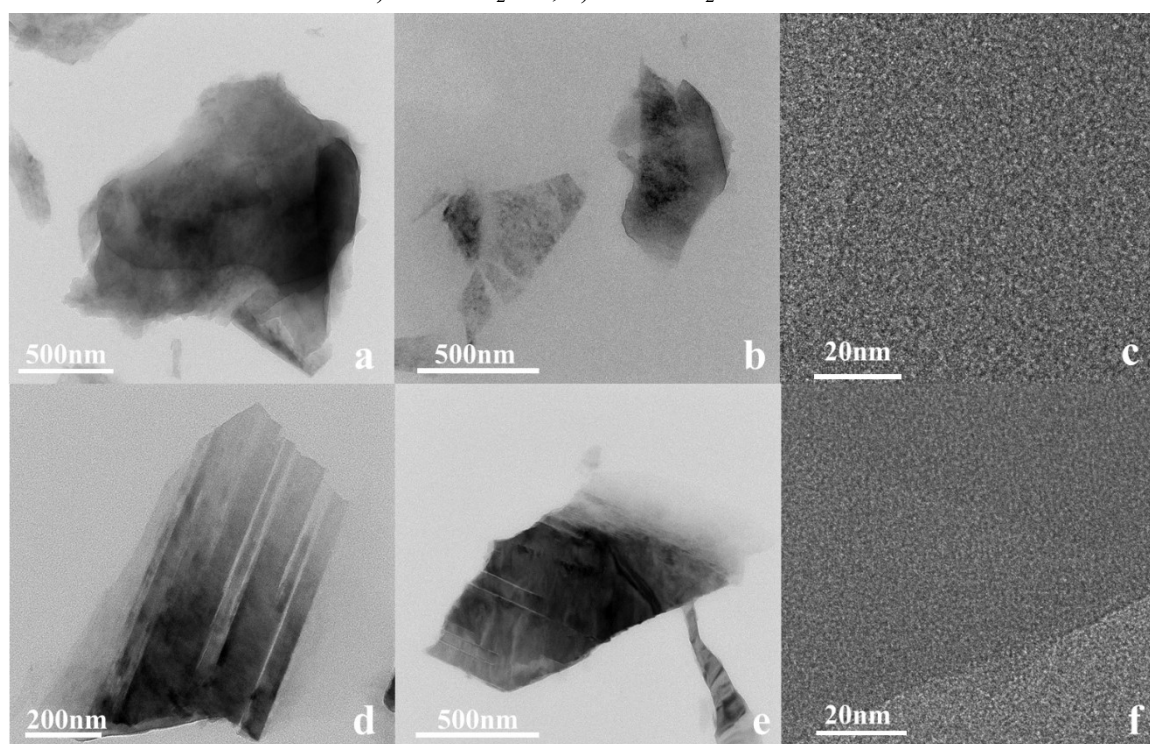

**Figure S3.** a,b) TEM and c) HRTEM image of Fe<sub>0.5</sub>Co<sub>0.5</sub>-MOF<sub>1</sub>/NF before the OER test, d,e) TEM and f) HRTEM image of Fe<sub>0.3</sub>Co<sub>0.7</sub>-MOF<sub>2</sub>/NF before the OER test

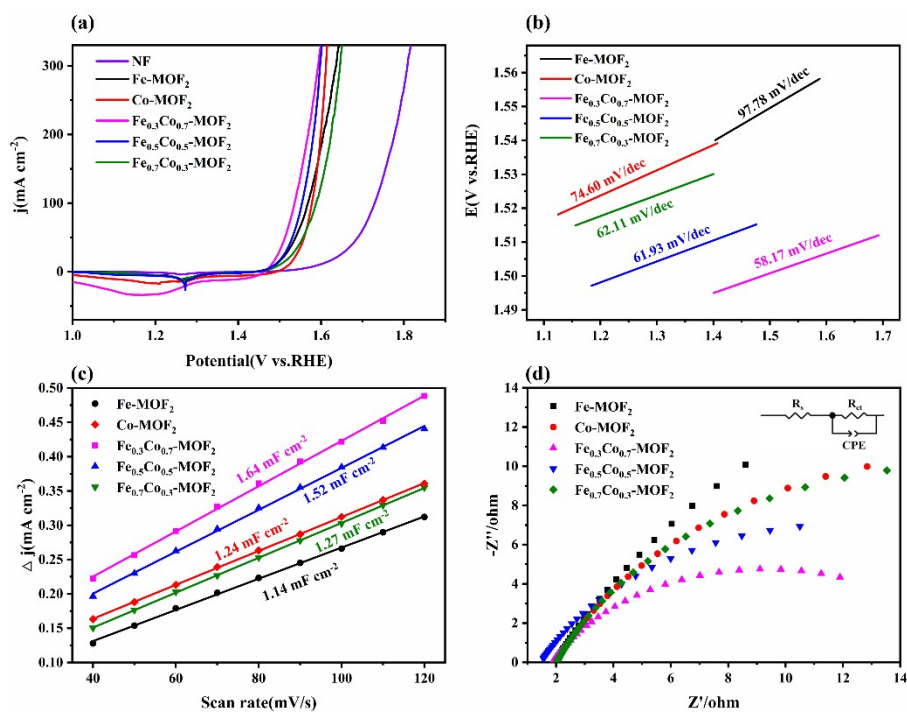

**Figure S4.** a) LSV curves b) Tafel plots c)  $C_{dl}$  curves and d) electrochemical impedance of  $Fe_xCo_{1-x}-MOF_2/NF$

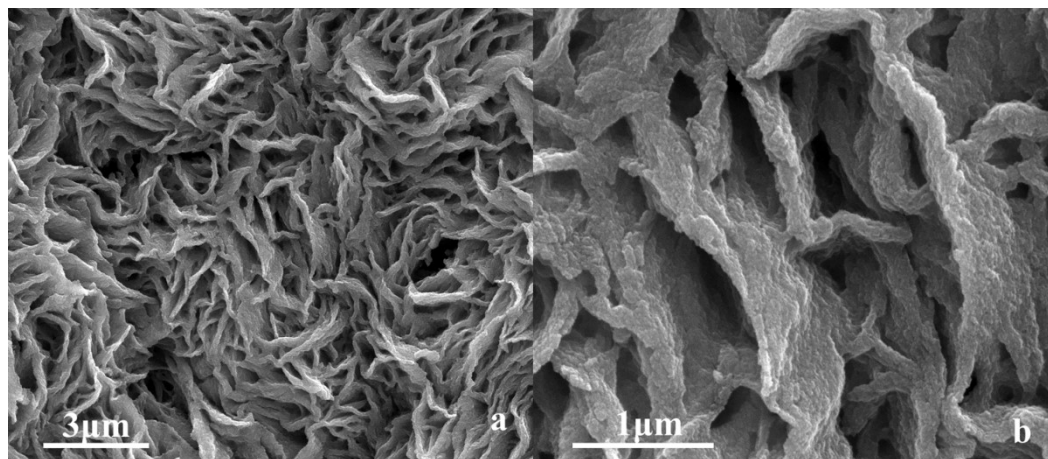

**Figure S5.** SEM  $Fe_{0.5}Co_{0.5}-MOF_1/NF$  after the 30 h stability test in 1 M KOH

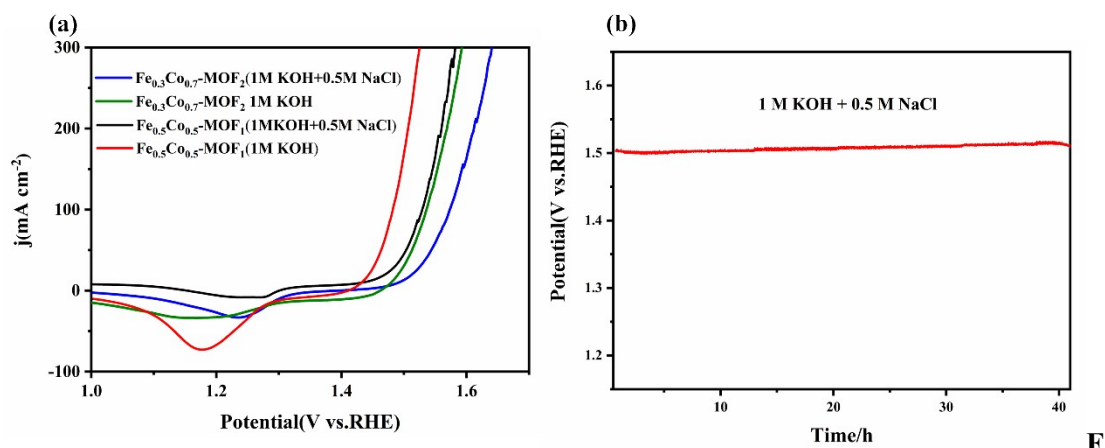

**Figure S6.** a) LSV curves in 1 M KOH and 1 M KOH+0.5 M NaCl of Fe<sub>0.5</sub>Co<sub>0.5</sub>-MOF<sub>1</sub>/NF and Fe<sub>0.3</sub>Co<sub>0.7</sub>-MOF<sub>2</sub>, b) Chronopotentiometric curve of Fe<sub>0.5</sub>Co<sub>0.5</sub>-MOF<sub>1</sub>/NF in 1 M KOH+0.5 M NaCl

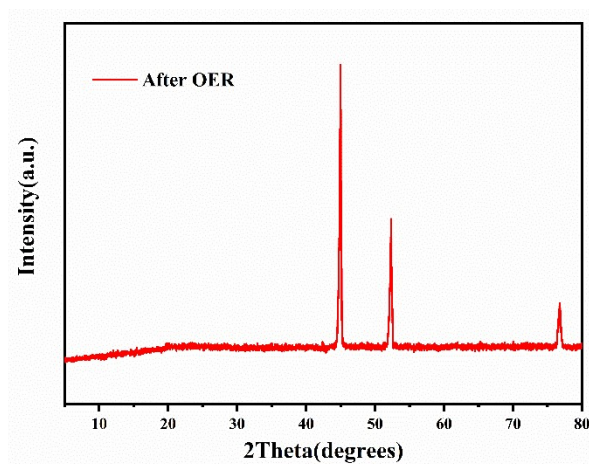

**Figure S7.** XRD patterns Fe<sub>0.5</sub>Co<sub>0.5</sub>-MOF<sub>1</sub>/NF after the 30 h stability test in 1 M KOH

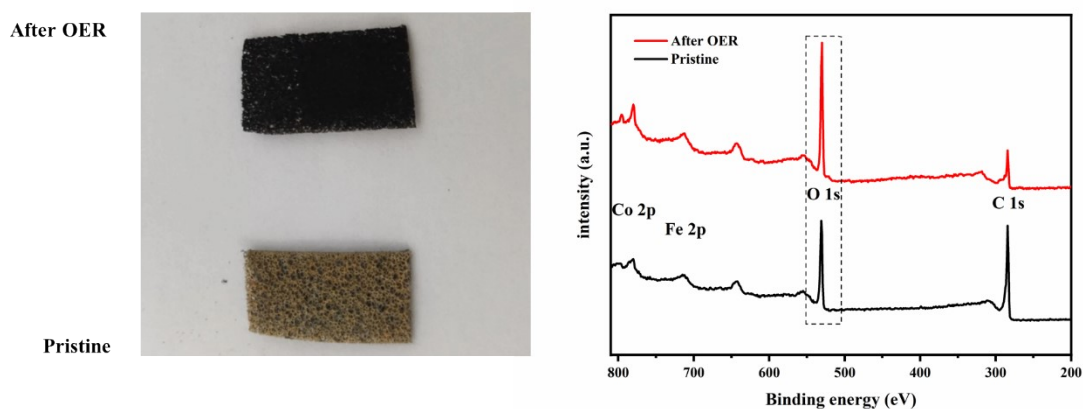

**Figure S8.** a) Photos, b) survey spectrum of pristine Fe<sub>0.5</sub>Co<sub>0.5</sub>-MOF<sub>1</sub>/NF and Fe<sub>0.5</sub>Co<sub>0.5</sub>-MOF<sub>1</sub>/NF after OER test

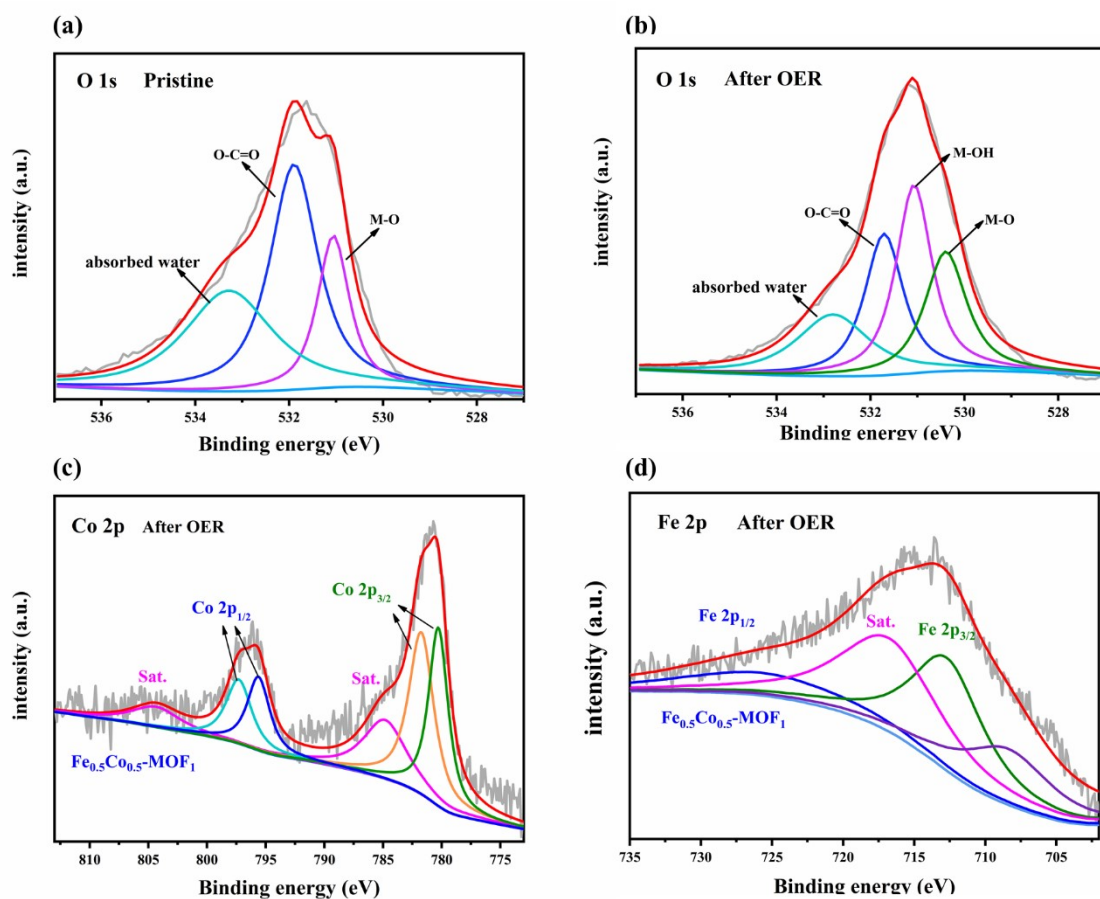

**Figure S9.** The high-resolution XPS spectra of a) O 1s in pristine  $\text{Fe}_{0.5}\text{Co}_{0.5}\text{-MOF}_1/\text{NF}$  b) O 1s c) Co 2p d) Fe 2p in  $\text{Fe}_{0.5}\text{Co}_{0.5}\text{-MOF}_1/\text{NF}$  after OER test

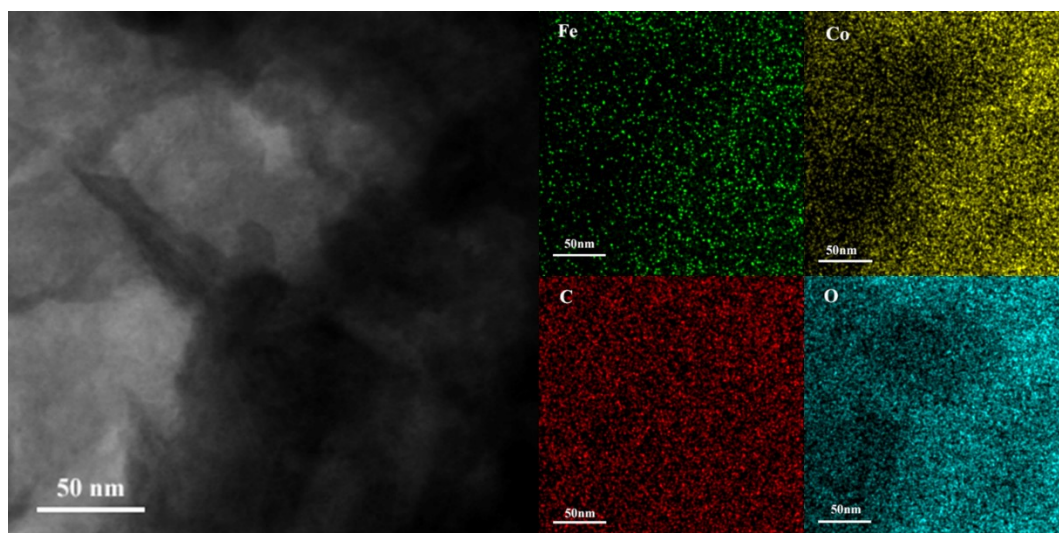

**Figure S10.** TEM image and corresponding EDS elemental mapping images of  $\text{Fe}_{0.5}\text{Co}_{0.5}\text{-MOF}_1/\text{NF}$  after OER test

**Table S1.** The amount of metal ions and ligands used to synthesize MOF<sub>1</sub>

| Catalyst                                                  | Fe(NO <sub>3</sub> ) <sub>3</sub> ·9H <sub>2</sub> O | Co(NO <sub>3</sub> ) <sub>2</sub> ·6H <sub>2</sub> O | BPDC              |
|-----------------------------------------------------------|------------------------------------------------------|------------------------------------------------------|-------------------|
| Fe-MOF <sub>1</sub> /NF                                   | 404.0 mg (1 mmol)                                    | 0 mg                                                 | 242.2 mg (1 mmol) |
| Fe <sub>0.3</sub> Co <sub>0.7</sub> -MOF <sub>1</sub> /NF | 121.2 mg (0.3 mmol)                                  | 203.7 mg (0.7 mmol)                                  | 242.2 mg (1 mmol) |
| Fe <sub>0.5</sub> Co <sub>0.5</sub> -MOF <sub>1</sub> /NF | 202.0 mg (0.5 mmol)                                  | 145.5 mg (0.5 mmol)                                  | 242.2 mg (1 mmol) |
| Fe <sub>0.7</sub> Co <sub>0.3</sub> -MOF <sub>1</sub> /NF | 282.8 mg (0.7 mmol)                                  | 87.3 mg (0.3 mmol)                                   | 242.2 mg (1 mmol) |
| Co-MOF <sub>1</sub> /NF                                   | 0 mg                                                 | 291.0 mg (1 mmol)                                    | 242.2 mg (1 mmol) |

**Table S2.** The amount of metal ions and ligands used to synthesize MOF<sub>2</sub>

| Catalyst                                                  | Fe(NO <sub>3</sub> ) <sub>3</sub> ·9H <sub>2</sub> O | Co(NO <sub>3</sub> ) <sub>2</sub> ·6H <sub>2</sub> O | BDC               |
|-----------------------------------------------------------|------------------------------------------------------|------------------------------------------------------|-------------------|
| Fe-MOF <sub>2</sub> /NF                                   | 404.0 mg (1 mmol)                                    | 0 mg                                                 | 166.1 mg (1 mmol) |
| Fe <sub>0.3</sub> Co <sub>0.7</sub> -MOF <sub>2</sub> /NF | 121.2 mg (0.3 mmol)                                  | 203.7 mg (0.7 mmol)                                  | 166.1 mg (1 mmol) |
| Fe <sub>0.5</sub> Co <sub>0.5</sub> -MOF <sub>2</sub> /NF | 202.0 mg (0.5 mmol)                                  | 145.5 mg (0.5 mmol)                                  | 166.1 mg (1 mmol) |
| Fe <sub>0.7</sub> Co <sub>0.3</sub> -MOF <sub>2</sub> /NF | 282.8 mg (0.7 mmol)                                  | 87.3 mg (0.3 mmol)                                   | 166.1 mg (1 mmol) |
| Co-MOF <sub>2</sub> /NF                                   | 0 mg                                                 | 291.0 mg (1 mmol)                                    | 166.1 mg (1 mmol) |

**Table S3.** Comparisons of electrochemical performance and the mass loading of electrodes

| Catalyst                                                  | Overpotential at 10 mA cm <sup>-2</sup> (mV) | Tafel slope (mV/dec) | C <sub>dl</sub> (mF cm <sup>-2</sup> ) | R <sub>ct</sub> (Ω) | Mass loading (mg cm <sup>-2</sup> ) |
|-----------------------------------------------------------|----------------------------------------------|----------------------|----------------------------------------|---------------------|-------------------------------------|
| Fe-MOF <sub>1</sub> /NF                                   | 280                                          | 86.33                | 1.13                                   | 22.32               | 3.7                                 |
| Fe <sub>0.3</sub> Co <sub>0.7</sub> -MOF <sub>1</sub> /NF | 252                                          | 41.21                | 2.17                                   | 17.12               | 4.3                                 |
| Fe <sub>0.5</sub> Co <sub>0.5</sub> -MOF <sub>1</sub> /NF | 217                                          | 31.16                | 2.40                                   | 4.19                | 4.1                                 |
| Fe <sub>0.7</sub> Co <sub>0.3</sub> -MOF <sub>1</sub> /NF | 254                                          | 51.90                | 1.86                                   | 2.68                | 4.0                                 |
| Co-MOF <sub>1</sub> /NF                                   | 270                                          | 74.38                | 1.24                                   | 6.62                | 4.7                                 |
| Fe-MOF <sub>2</sub> /NF                                   | 272                                          | 97.78                | 1.14                                   | 60.95               | 4.2                                 |
| Fe <sub>0.3</sub> Co <sub>0.7</sub> -MOF <sub>2</sub> /NF | 249                                          | 58.17                | 1.64                                   | 14.91               | 4.4                                 |
| Fe <sub>0.5</sub> Co <sub>0.5</sub> -MOF <sub>2</sub> /NF | 269                                          | 61.93                | 1.52                                   | 21.34               | 4.5                                 |
| Fe <sub>0.7</sub> Co <sub>0.3</sub> -MOF <sub>2</sub> /NF | 258                                          | 62.11                | 1.27                                   | 29.04               | 4.2                                 |
| Co-MOF <sub>2</sub> /NF                                   | 284                                          | 74.60                | 1.24                                   | 31.21               | 3.8                                 |

**Table S4.** Comparison of OER catalytic performances of various MOF-based electrocatalysts

| Catalysts                                                  | Overpotential<br>(mV@ mA/cm <sup>2</sup> ) | Tafel slope<br>(mV/dec) | Ligand                                                      | Reference        |
|------------------------------------------------------------|--------------------------------------------|-------------------------|-------------------------------------------------------------|------------------|
| <b>Fe<sub>0.5</sub>Co<sub>0.5</sub>-MOF<sub>1</sub>/NF</b> | <b>217@10</b>                              | <b>31.16</b>            | <b>BPDC</b>                                                 | <b>This work</b> |
| 2D MOF-Fe/Co(1:2)                                          | 238@10                                     | 52                      | 1,4-BDC                                                     | 1                |
| MIL-53(Co-Fe)/NF                                           | 262@100                                    | 69                      | TPA                                                         | 2                |
| Fe <sub>2</sub> Co-MOF                                     | 224@10                                     | 45.3                    | TPA                                                         | 3                |
| Ni-Fe-MOF NSs                                              | 221@10                                     | 56                      | 1,4-BDC                                                     | 4                |
| (Fe,Co)OOH/MI                                              | 230@10                                     | 53                      | MI                                                          | 5                |
| BaTiO <sub>3</sub> @MOF-Fe/Co                              | 247@10                                     | 38.4                    | 1,4-BDC                                                     | 6                |
| CoFe-MOF-OH                                                | 265@10                                     | 44                      | C <sub>5</sub> H <sub>4</sub> N <sub>2</sub> O <sub>4</sub> | 7                |
| Co <sub>3</sub> Fe-MOF                                     | 280@10                                     | 38                      | NH <sub>2</sub> -BDC                                        | 8                |
| Au <sub>5,30</sub> /(FCN)MOF/NP                            | 216@10                                     | 31.7                    | 1,4-BDC                                                     | 9                |
| Fe-Co-O/Co@                                                |                                            |                         |                                                             |                  |
| NC-mNS/NF                                                  | 257@10                                     | 41.56                   | MI                                                          | 10               |
| Co <sub>2</sub> Fe-MOF                                     | 280@10                                     | 44.7                    | H <sub>3</sub> BTC                                          | 11               |
| CF-PBA-400                                                 | 254@10                                     | 51                      | PBA                                                         | 12               |
| CoFeBiP                                                    | 273@10                                     | 77.3                    | MI                                                          | 13               |
| NiFc-MOF/NF                                                | 195@10                                     | 44.1                    | FcDA                                                        | 14               |
| Ni <sub>2</sub> Fe <sub>1</sub> Sq-zbr-MOF                 | 230@10                                     | 37                      | C <sub>4</sub> H <sub>2</sub> O <sub>4</sub>                | 15               |

TPA, 1, 4-BDC: 1, 4-benzenedicarboxylate

MI: 2-Methylimidazole

C<sub>5</sub>H<sub>4</sub>N<sub>2</sub>O<sub>4</sub>: 4, 5-Imidazoledicarboxylic acid

NH<sub>2</sub>-BDC: 2-Aminoterephthalic acid

H<sub>3</sub>BTC: Trimesic acid

PBA: Prussian blue analogue

FcDA: 1, 1'-Ferrocene dicarboxylate

C<sub>4</sub>H<sub>2</sub>O<sub>4</sub>: 3, 4-Dihydroxy-3-cyclobutene-1, 2-dione (squaric acid)

## References

- 1 K. Ge, S. Sun, Y. Zhao, K. Yang, S. Wang, Z. Zhang, J. Cao, Y. Yang, Y. Zhang, M. Pan and L. Zhu, *Angew. Chem., Int. Ed.*, 2021, **60**, 12097-12102.
- 2 M. Xie, Y. Ma, D. Lin, C. Xu, F. Xie and W. Zeng, *Nanoscale*, 2020, **12**, 67-71.
- 3 X. Ling, F. Du, Y. Zhang, Y. Shen, W. Gao, B. Zhou, Z. Wang, G. Li, T. Li, Q. Shen, Y. Xiong, X. Wang, Y. Zhou and Z. Zou, *J. Mater. Chem. A*, 2021, **9**, 13271-13278.
- 4 F. L. Li, P. Wang, X. Huang, D. J. Young, H. F. Wang, P. Braunstein and J. P. Lang, *Angew. Chem., Int. Ed.*, 2019, **58**, 7051-7056.



- 5 W. Huang, J. Li, X. Liao, R. Lu, C. Ling, X. Liu, J. Meng, L. Qu, M. Lin, X. Hong, X. Zhou, S. Liu, Y. Zhao, L. Zhou and L. Mai, *Adv. Mater.*, 2022, **34**, 2200270.
- 6 S. Wang, Q. Li, S. Sun, K. Ge, Y. Zhao, K. Yang, Z. Zhang, J. Cao, J. Lu, Y. Yang, Y. Zhang, M. Pan, Z. Lin and L. Zhu, *J. Mater. Chem. A*, 2022, **10**, 5350-5360.
- 7 Z. Zou, T. Wang, X. Zhao, W.-J. Jiang, H. Pan, D. Gao and C. Xu, *ACS Catal.*, 2019, **9**, 7356-7364.
- 8 W. Li, W. Fang, C. Wu, K. N. Dinh, H. Ren, L. Zhao, C. Liu and Q. Yan, *J. Mater. Chem. A*, 2020, **8**, 3658-3666.
- 9 C.-C. Cheng, P.-Y. Cheng, C.-L. Huang, D. Senthil Raja, Y.-J. Wu and S.-Y. Lu, *Appl. Catal. B: Environ.*, 2021, **286**.
- 10 T. I. Singh, G. Rajeshkhanna, U. N. Pan, T. Kshetri, H. Lin, N. H. Kim and J. H. Lee, *Small*, 2021, **17**, 2101312.
- 11 S. Xie, F. Li, S. Xu, J. Li and W. Zeng, *Chin. J. Catal.*, 2019, **40**, 1205-1211.
- 12 J. Zhou, Y. Hu, Y.-C. Chang, Z. Hu, Y.-C. Huang, Y. Fan, H.-J. Lin, C.-W. Pao, C.-L. Dong, J.-F. Lee, C.-T. Chen, J.-Q. Wang and L. Zhang, *ACS Catal.*, 2022, **12**, 3138-3148.
- 13 C. Wang, H. Shang, Y. Wang, J. Li, S. Guo, J. Guo and Y. Du, *Nanoscale*, 2021, **13**, 7279-7284.
- 14 J. Liang, X. Gao, B. Guo, Y. Ding, J. Yan, Z. Guo, E. C. M. Tse and J. Liu, *Angew. Chem., Int. Ed.*, 2021, **60**, 12770-12774.
- 15 S. Kandambeth, V. S. Kale, D. Fan, J. A. Bau, P. M. Bhatt, S. Zhou, A. Shkurenko, M. Rueping, G. Maurin, O. Shekhah and M. Eddaoudi, *Adv. Energy Mater.*, 2023, **13**, 2202964.
